# Supplementary material for: Comparative Study of a Series of 99mTc(CO)3 Mannosylated Dextran Derivatives for Sentinel Lymph Node Detection
Source: MDPI journal article supplement (doi:10.3390/molecules26164797), 2021-08-07
Supplement: s1 [file s1]

## Supporting Information

### Comparative study of a series of $^{99m}\text{Tc}(\text{CO})_3$ Mannosylated Dextran Derivatives for Sentinel Lymph Node Detection

Afroditi Papasavva <sup>1</sup>, Antonio Shegani <sup>1</sup>, Christos Kiritsis <sup>1</sup>, Ioanna Roupa <sup>1</sup>, Myrto Ischyropoulou <sup>1</sup>, Konstantina Makrypidi <sup>1</sup>, Irineos Pilatis <sup>2</sup>, George Loudos <sup>2</sup>, Maria Pelecanou <sup>3</sup>, Minas Papadopoulos <sup>1</sup> and Ioannis Pirmettis <sup>1, \*</sup>

<sup>1</sup>Institute of Nuclear and Radiological Sciences and Technology, Energy & Safety, NCSR "Demokritos", 15310 Athens, Greece;

<sup>2</sup>BIOEMTECH Laboratories, Lefkippos Attica Technology Park - NCSR "Demokritos", 15310 Athens, Greece;

<sup>3</sup>Institute of Biosciences & Applications, NCSR "Demokritos", 15310 Athens, Greece;

\*Correspondence: [ipirme@rrp.demokritos.gr](mailto:ipirme@rrp.demokritos.gr); Tel.: +30 210 650 3921

**Corresponding Author.** Dr. Ioannis Pirmettis, Ph.D., INRASTES, NCSR "Demokritos," Ag. Paraskevi Attikis, GR-15310 Athens, Greece; Phone: +30 210 650 3921; E-mail: [ipirme@rrp.demokritos.gr](mailto:ipirme@rrp.demokritos.gr).

## Contents

|                                                                                                                                                                                                                                 |   |
|---------------------------------------------------------------------------------------------------------------------------------------------------------------------------------------------------------------------------------|---|
| <b>Figure S1.</b> $^1\text{H}$ NMR spectra (range $\delta_{\text{H}}$ 6.2–1.7) of the allyl derivative D75A, the S-derivatized cysteinyl dextran D75C and the mannosylated dextran D75CM in $\text{D}_2\text{O}$ at 25 °C. .... | 3 |
| <b>Figure S2.</b> $^1\text{H}$ NMR spectra (range 5.78 -1.56 ppm) of the D10CM, D20CM, D40CM, D150CM and D500CM derivatives in $\text{D}_2\text{O}$ at 25 °C. ....                                                              | 4 |
| <b>Table S1.</b> Biodistribution of radioactivity after subcutaneous injection to the rear footpad of $^{99\text{m}}\text{Tc}$ - <b>D10CM</b> - <b>D500CM</b> in mice at (a) 15, (b) 60, and (c) 180 min. ....                  | 5 |

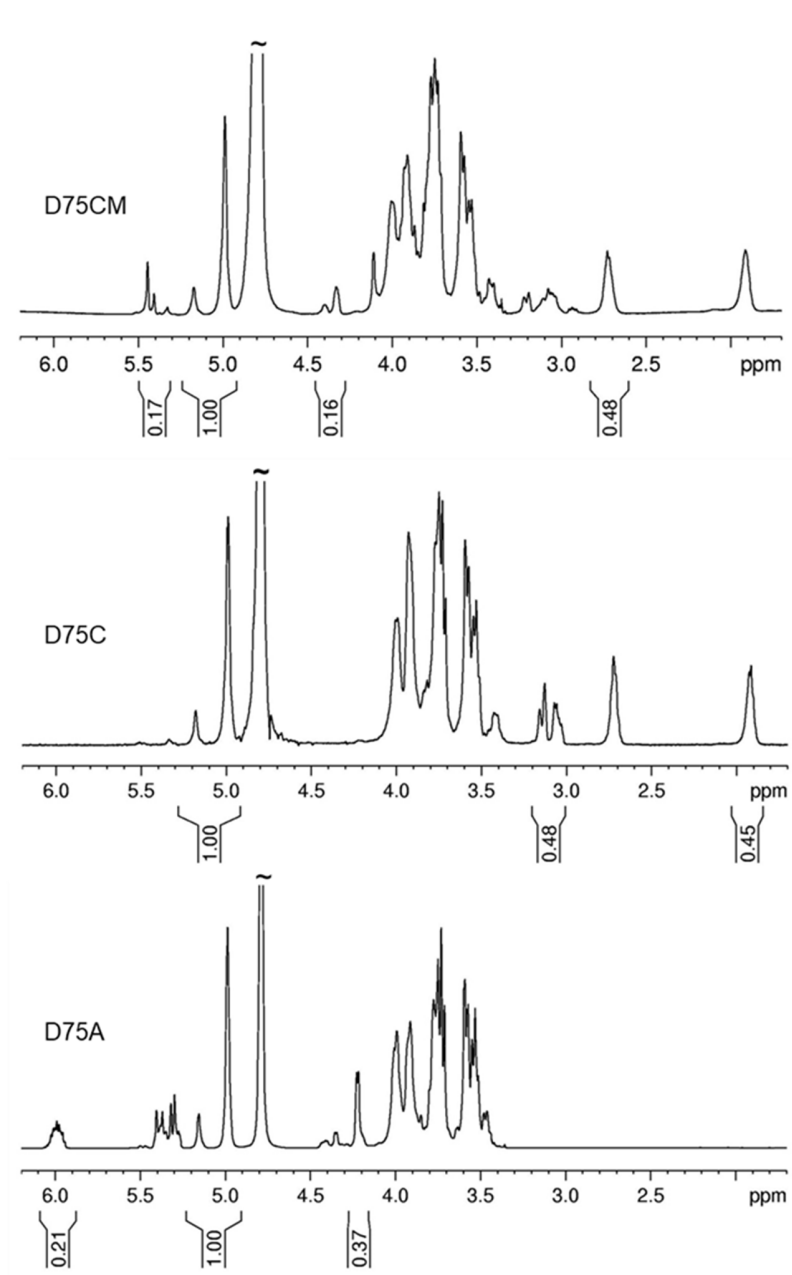

**Figure S1.**  $^1\text{H}$  NMR spectra (range  $\delta_{\text{H}}$  6.2–1.7) of the allyl derivative D75A, the S-derivatized cysteinyl dextran D75C and the mannosylated dextran D75CM in  $\text{D}_2\text{O}$  at 25  $^{\circ}\text{C}$ .

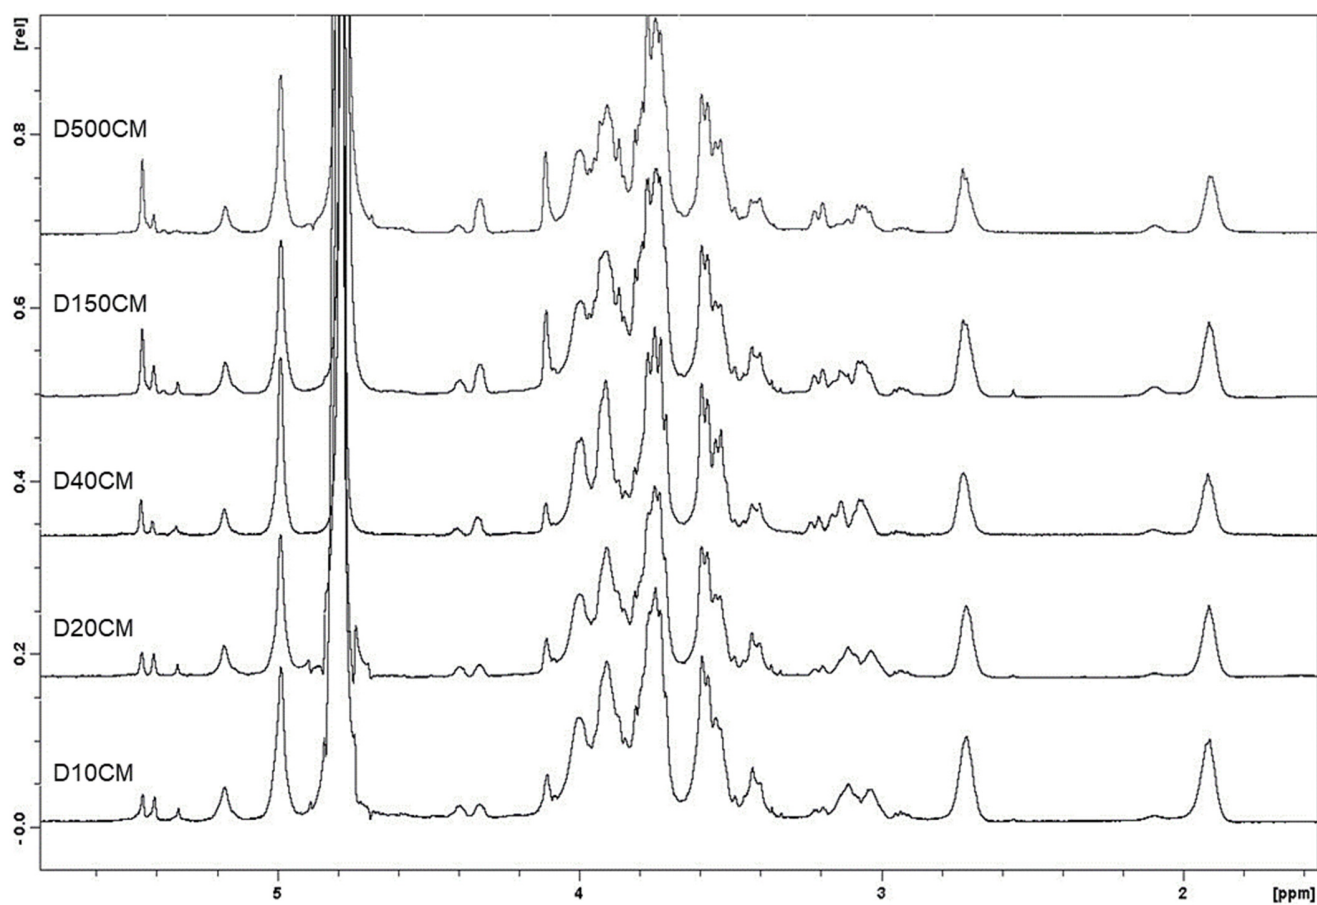

**Figure S2.**  $^1\text{H}$  NMR spectra (range 5.78 -1.56 ppm) of the D10CM, D20CM, D40CM, D150CM and D500CM derivatives in  $\text{D}_2\text{O}$  at 25 °C.

**Table S1.** Biodistribution of radioactivity after subcutaneous injection to the rear footpad of <sup>99m</sup>Tc-D10CM - D500CM in mice at (a) 15, (b) 60 and (c) 180 min.

| a) 15 min p.i.        | <sup>99m</sup> Tc-D10CM | <sup>99m</sup> Tc-D20CM | <sup>99m</sup> Tc-D40CM | <sup>99m</sup> Tc-D75CM | <sup>99m</sup> Tc-D150CM | <sup>99m</sup> Tc-D500CM |
|-----------------------|-------------------------|-------------------------|-------------------------|-------------------------|--------------------------|--------------------------|
| Blood                 | 0.76 ± 0.18             | 0.52 ± 0.12             | 1.60 ± 0.82             | 1.93 ± 0.91             | 2.06 ± 0.14              | 1.53 ± 0.44              |
| Liver                 | 2.77 ± 0.42             | 1.08 ± 0.40             | 2.65 ± 1.29             | 3.62 ± 0.87             | 3.72 ± 0.75              | 1.37 ± 0.27              |
| Heart                 | 0.87 ± 0.24             | 0.18 ± 0.02             | 0.72 ± 0.21             | 0.44 ± 0.12             | 0.57 ± 0.07              | 0.29 ± 0.09              |
| Kidneys               | 3.12 ± 0.38             | 1.59 ± 0.11             | 2.20 ± 0.87             | 2.22 ± 0.47             | 3.06 ± 0.86              | 1.52 ± 0.51              |
| Stomach               | 0.15 ± 0.02             | 0.07 ± 0.03             | 0.46 ± 0.28             | 0.33 ± 0.17             | 0.24 ± 0.09              | 0.77 ± 0.30              |
| Intestines            | 0.22 ± 0.02             | 0.06 ± 0.01             | 0.33 ± 0.11             | 0.36 ± 0.12             | 0.34 ± 0.08              | 0.21 ± 0.11              |
| Spleen                | 0.52 ± 0.01             | 0.31 ± 0.08             | 0.81 ± 0.48             | 0.73 ± 0.22             | 0.38 ± 0.18              | 0.50 ± 0.23              |
| Muscle                | 0.11 ± 0.00             | 0.06 ± 0.02             | 0.29 ± 0.18             | 0.17 ± 0.11             | 0.18 ± 0.04              | 0.11 ± 0.03              |
| Lungs                 | 0.32 ± 0.08             | 0.19 ± 0.12             | 1.33 ± 0.59             | 0.96 ± 0.50             | 1.11 ± 0.40              | 0.62 ± 0.21              |
| Urine*                | 1.94 ± 0.30             | 0.95 ± 0.37             | 0.76 ± 0.27             | 2.06 ± 0.74             | 2.03 ± 0.52              | 1.64 ± 0.18              |
| 1 <sup>st</sup> node* | 4.71 ± 0.13             | 3.04 ± 0.36             | 1.61 ± 0.39             | 4.20 ± 0.84             | 4.16 ± 0.75              | 3.53 ± 0.44              |
| 2 <sup>nd</sup> node* | 1.84 ± 0.05             | 1.77 ± 0.39             | 0.49 ± 0.07             | 0.99 ± 0.75             | 0.97 ± 0.30              | 1.22 ± 0.10              |
| Injection site*       | 68.24 ± 0.70            | 74.68 ± 0.72            | 63.11 ± 2.94            | 66.84 ± 1.96            | 63.28 ± 1.51             | 72.47 ± 2.72             |

| b) 60 min p.i.        | <sup>99m</sup> Tc-D10CM | <sup>99m</sup> Tc-D20CM | <sup>99m</sup> Tc-D40CM | <sup>99m</sup> Tc-D75CM | <sup>99m</sup> Tc-D150CM | <sup>99m</sup> Tc-D500CM |
|-----------------------|-------------------------|-------------------------|-------------------------|-------------------------|--------------------------|--------------------------|
| Blood                 | 0.31 ± 0.02             | 0.10 ± 0.03             | 1.62 ± 0.23             | 0.40 ± 0.19             | 0.92 ± 0.03              | 0.75 ± 0.15              |
| Liver                 | 3.86 ± 0.55             | 1.38 ± 0.13             | 1.70 ± 0.71             | 3.70 ± 1.44             | 3.76 ± 0.22              | 2.72 ± 0.25              |
| Heart                 | 0.27 ± 0.03             | 0.14 ± 0.06             | 0.56 ± 0.10             | 0.34 ± 0.11             | 0.28 ± 0.04              | 0.18 ± 0.02              |
| Kidneys               | 1.84 ± 1.15             | 0.40 ± 0.03             | 1.02 ± 0.51             | 0.90 ± 0.09             | 1.97 ± 0.47              | 0.92 ± 0.15              |
| Stomach               | 0.32 ± 0.11             | 0.05 ± 0.04             | 0.85 ± 0.33             | 0.29 ± 0.04             | 0.14 ± 0.08              | 0.86 ± 0.54              |
| Intestines            | 0.31 ± 0.03             | 0.11 ± 0.01             | 0.62 ± 0.08             | 0.33 ± 0.08             | 0.73 ± 0.31              | 0.28 ± 0.03              |
| Spleen                | 0.95 ± 0.29             | 0.44 ± 0.14             | 1.92 ± 0.40             | 1.43 ± 1.33             | 1.82 ± 0.39              | 0.78 ± 0.12              |
| Muscle                | 0.10 ± 0.02             | 0.06 ± 0.02             | 0.19 ± 0.03             | 0.15 ± 0.03             | 0.09 ± 0.03              | 0.06 ± 0.01              |
| Lungs                 | 0.24 ± 0.01             | 0.09 ± 0.01             | 0.91 ± 0.05             | 0.31 ± 0.06             | 0.39 ± 0.12              | 0.29 ± 0.03              |
| Urine*                | 0.79 ± 0.70             | 1.73 ± 1.22             | 0.85 ± 1.21             | 1.69 ± 2.39             | 1.48 ± 0.42              | 2.31 ± 1.55              |
| 1 <sup>st</sup> node* | 7.49 ± 0.88             | 8.36 ± 0.73             | 7.40 ± 0.89             | 15.00 ± 1.50            | 11.73 ± 0.64             | 5.80 ± 0.58              |
| 2 <sup>nd</sup> node* | 2.28 ± 0.19             | 2.37 ± 0.30             | 2.00 ± 0.31             | 1.81 ± 0.77             | 2.17 ± 0.29              | 1.93 ± 0.49              |
| Injection site*       | 64.03 ± 1.56            | 71.41 ± 0.92            | 51.59 ± 4.25            | 53.20 ± 2.96            | 56.34 ± 3.69             | 68.15 ± 3.88             |

| c) 180 min p.i.       | <sup>99m</sup> Tc-D10CM | <sup>99m</sup> Tc-D20CM | <sup>99m</sup> Tc-D40CM | <sup>99m</sup> Tc-D75CM | <sup>99m</sup> Tc-D150CM | <sup>99m</sup> Tc-D500CM |
|-----------------------|-------------------------|-------------------------|-------------------------|-------------------------|--------------------------|--------------------------|
| Blood                 | 0.23 ± 0.01             | 0.08 ± 0.02             | 1.17 ± 0.02             | 0.18 ± 0.04             | 0.29 ± 0.12              | 0.20 ± 0.02              |
| Liver                 | 2.75 ± 0.59             | 1.79 ± 0.35             | 3.85 ± 2.03             | 2.22 ± 0.16             | 4.14 ± 1.94              | 3.30 ± 0.34              |
| Heart                 | 0.19 ± 0.00             | 0.09 ± 0.03             | 0.40 ± 0.05             | 0.35 ± 0.03             | 0.27 ± 0.06              | 0.10 ± 0.01              |
| Kidneys               | 1.17 ± 0.66             | 0.51 ± 0.21             | 0.76 ± 0.92             | 0.76 ± 0.13             | 1.74 ± 0.39              | 0.52 ± 0.09              |
| Stomach               | 0.31 ± 0.10             | 0.25 ± 0.17             | 1.10 ± 0.44             | 1.08 ± 0.66             | 0.48 ± 0.37              | 1.02 ± 0.29              |
| Intestines            | 0.27 ± 0.02             | 0.29 ± 0.18             | 1.68 ± 0.13             | 0.81 ± 0.60             | 0.63 ± 0.13              | 0.32 ± 0.04              |
| Spleen                | 0.39 ± 0.08             | 0.39 ± 0.10             | 1.13 ± 0.51             | 1.19 ± 0.33             | 1.82 ± 0.97              | 1.68 ± 0.94              |
| Muscle                | 0.08 ± 0.02             | 0.03 ± 0.01             | 0.75 ± 0.41             | 0.34 ± 0.11             | 0.07 ± 0.01              | 0.02 ± 0.01              |
| Lungs                 | 0.18 ± 0.02             | 0.09 ± 0.03             | 0.30 ± 0.27             | 0.38 ± 0.06             | 0.26 ± 0.05              | 0.13 ± 0.01              |
| Urine*                | 4.37 ± 2.19             | 1.32 ± 1.83             | 1.80 ± 1.27             | 4.45 ± 3.23             | 5.58 ± 1.72              | 5.15 ± 0.60              |
| 1 <sup>st</sup> node* | 7.73 ± 0.75             | 6.44 ± 1.01             | 8.79 ± 0.25             | 13.53 ± 0.45            | 12.54 ± 1.93             | 7.53 ± 1.41              |
| 2 <sup>nd</sup> node* | 2.29 ± 0.52             | 1.65 ± 0.69             | 2.28 ± 0.24             | 1.49 ± 0.20             | 2.11 ± 0.23              | 2.30 ± 0.59              |
| Injection site*       | 62.60 ± 1.23            | 70.78 ± 0.97            | 46.84 ± 4.57            | 51.04 ± 1.20            | 55.20 ± 4.12             | 62.52 ± 3.19             |

The results are expressed as % ID/g. Mean values are reported ± SD; n = 3. \*Mean % ID values are reported ± SD; n = 3.
